# Supplementary material
Source: HighWire-hosted journal article supplement (http://bmjopenquality.bmj.com/highwire/filestream/145894/field_highwire_adjunct_files/1/bmjoq-2023-002335supp002_data_supplement.pdf)
Supplement: bmjoq-2023-002335supp002_data_supplement.pdf [file bmjoq-2023-002335supp002_data_supplement.pdf]

## interview guide

Participant number:

Demographics:

Mr./Ms.:

Nursing care center:

education:

Marital status:

Age:

Gender:

Shift work:

Work history of home care:

Position: (nurse, Nurse assistant, family caregiver(Relative to the patient)):

The questions you will be asked are related to the explanation of the **Contributing Factors involved in the safety of elderlies with chronic illness in home health care: A Qualitative Study**. Your answers to these questions will be used to complete my article. None of your names will be mentioned in any part of the thesis and the details of your information and answers will remain completely confidential. Also, whenever you don't want to continue the interview, you can tell me and I will stop the interview. Thank you in advance for your cooperation. If you allow us to start the interview?

(warm up will be done before the interview)

1. Tell us a little about your experience of caring for patients at home?
2. According to your experience, which factors facilitate the safety of the patients at home? If possible: give an example, explain a little more?
3. According to your experience, which factors and problems threaten the safety of the patients at home? If possible: give an example, explain a little more?
4. Are there any items that I did not ask and you wish to add?
